# Interaction between Polo and BicD proteins links oocyte determination and meiosis control in *Drosophila*

Vincent Mirouse<sup>1</sup>, Etienne Formstecher<sup>2</sup> and Jean-Louis Couderc<sup>1,\*</sup>

Meiosis is a specialized cell cycle limited to the gametes in Metazoa. In *Drosophila*, oocyte determination and meiosis control are interdependent processes, and BicD appears to play a key role in both. However, the exact mechanism of how BicD-dependent polarized transport could influence meiosis and vice versa remains an open question. In this article, we report that the cell cycle regulatory kinase Polo binds to BicD protein during oogenesis. Polo is expressed in all cells during cyst formation before specifically localizing to the oocyte. This is the earliest known example of asymmetric localization of a cell-cycle regulator in this process. This localization is dependent on BicD and the Dynein complex. Loss- and gain-of-function experiments showed that Polo has two independent functions. On the one hand, it acts as a trigger for meiosis. On the other hand, it is independently required, in a cell-autonomous manner, for the activation of BicD-dependent transport. Moreover, we show that Polo overexpression can rescue a hypomorphic mutation of BicD by restoring its localization and its function, suggesting that the requirement for Polo in polarized transport acts through regulation of BicD. Taken together, our data indicate the existence of a positive feedback loop between BicD and Polo, and we propose that this loop represents a functional link between oocyte specification and the control of meiosis.

**KEY WORDS:** Polo, BicD, Oocyte, Meiosis, Polarized transport, *Drosophila*

## INTRODUCTION

A specific feature of germline cells is their ability to undergo meiosis when they differentiate into gametes. However, the mechanisms linking the fate of gamete cells to this specialized cell cycle are still poorly understood. During *Drosophila* oogenesis, the determination of the oocyte and the first steps of meiosis appear to be closely linked (Huynh and St Johnston, 2004; Riechmann and Ephrussi, 2001).

*Drosophila* oogenesis begins in a structure called the germarium, which is divided into several regions (Fig. 2A) (Spradling, 1993). In its anterior part, named region 1, germline stem cell progeny undergoes a precise pattern of divisions to form cysts of 16 cells interconnected by cytoplasmic bridges, the ring canals. Oocyte differentiation is a progressive process that begins in region 2a by the selection of two pro-oocytes corresponding to the first two cells of the cyst. As the cyst enters region 2b and contacts the follicle cells, one cell is selected to become the oocyte, and the other 15 cells will differentiate into nurse cells. This progressive specification can be observed by the accumulation of mRNA and proteins such as BicD (BicD), and by the migration of the centrioles (Fig. 2A) (Bolivar et al., 2001; Cox and Spradling, 2003; Ephrussi et al., 1991; Keyes and Spradling, 1997; Suter et al., 1989; van Eeden et al., 2001). When the cyst progresses from region 2b to region 3, it starts to round up, with the oocyte always positioned at the posterior. At this step, centrosomes, mRNAs, proteins and organelles found at the anterior of the oocyte move to the posterior. This early polarization event is important as it prefigures the future antero-posterior axis of the embryo (Huynh et al., 2001).

In each cyst, a germline-specific membranous structure called the fusome extends asymmetrically throughout the ring canals in all 16 cells (Fig. 2A) (de Cuevas et al., 1996; Lin et al., 1994). This

asymmetric distribution is thought to determine which cell becomes the oocyte (de Cuevas and Spradling, 1998; Lin and Spradling, 1995; Lin et al., 1994; Yue and Spradling, 1992). However, this initial asymmetry alone is not sufficient to understand oocyte differentiation, and genetic analyses are required to distinguish different steps in the differentiation process.

The polarization of the germline cyst relies on microtubule-dependent transport processes. Microtubules and dynein are required for the accumulation of oocyte determinants, such as BicD protein, and thus for oocyte differentiation (Theurkauf et al., 1993; Bolivar et al., 2001). The transport of mRNA and proteins to the oocyte is also dependent on BicD and Egl proteins (Bolivar et al., 2001; Clark and McKearin, 1996; Navarro et al., 2004; Ran et al., 1994; Schupbach and Wieschaus, 1991; Suter et al., 1989). These proteins interact with each other, and both are able to interact with different subunits of the Dynein complex (Hoogenraad et al., 2001; Mach and Lehmann, 1997; Navarro et al., 2004). BicD may function as an adaptor for cargo molecules such as mRNA, and it has been suggested that Egl is an important regulator of this function. Finally, the early polarization of the oocyte in region 2b-3 involves many genes including the *dynein light chain 8* and, again, *egl* and *BicD* (Huynh and St Johnston, 2000; Navarro et al., 2004).

All these functional steps are required for establishing or maintaining oocyte fate. Each mutation that disrupts this process leads to the formation of cysts that have neither an oocyte nor a cell in meiosis, and instead consist of 16 endoreplicative nurse cells. Thus, meiosis control is dependent on oocyte determination.

During *Drosophila* oogenesis, meiosis starts with homologous recombination that can be recognized through the formation of the synaptonemal complexes (SCs) and the recruitment of proteins such as C(3)G (Huynh and St Johnston, 2000; Page and Hawley, 2001; Hong et al., 2003; Carpenter, 1975). Meiosis begins in region 2a of the germarium, usually in four cells of a cyst (Fig. 2A). Meiosis is quickly restricted to the two pro-oocytes, then to the oocyte as the cyst progresses into region 2b. Therefore, meiotic control appears to be spatially and temporally correlated with oocyte determination, and it is difficult to determine whether one process precedes the other.

<sup>1</sup>Inserm, U384, Clermont-Ferrand, F-63001 France; Univ Clermont 1, UFR Médecine, 28, place Henri Dunant, Clermont-Ferrand, F-63001 France. <sup>2</sup>Hybrigenics SA, 3-5 Impasse Reille, 75014 Paris, France.

\*Author for correspondence (e-mail: j.l.couderc@inserm.u-clermont1.fr)

Functional studies have provided further evidence on the links between oocyte determination and meiosis. Null mutations of *egl* and *BicD* have been described to have dramatic and opposite effects on meiosis (Huynh and St Johnston, 2000). In *BicD* mutant cysts, no cells possess SCs, whereas all the cells of *egl* mutant cysts form SCs in region 2a before all of them exit meiosis simultaneously. Although the initial difference between these two mutants is not yet understood, this observation shows that both are involved in the initial restriction of meiosis to four cells. Finally, proteins required for early oocyte polarization are also required for maintaining the oocyte in meiosis after its restriction to one cell (reviewed by Huynh and St Johnston, 2004). Therefore, apart from the essential role of *BicD* and *Egl*, the spatiotemporal control of meiosis remains poorly understood.

Obviously, initiation of meiosis is itself under the control of classical cell-cycle regulators. Partial loss-of-function mutations in cyclin E, the main cyclin controlling replication and endoreplication, can lead to the formation of 16-cell cysts containing two meiotic cells, both presenting oocyte-like nuclear and cytoplasmic features (Lilly and Spradling, 1996). Conversely, a mutation in *p27cip/dacapo*, a negative regulator of cyclin E, induces the formation of cysts with 16 endoreplicative nurse cells and no oocyte (Hong et al., 2003). These findings allow the following conclusions. First, meiosis and endoreplication seem to act in competition, as the reduction of a positive or negative determinant of one process promotes or represses the other, respectively. Second, the cell cycle decision of a cell is sufficient to determine its fate, as both oocyte and nurse cells can be led to adopt the other fate by altering the control of the cell cycle. Finally, these results strongly suggest that the choice between endoreplication and meiosis involves the asymmetric distribution of cell-cycle regulators, and this asymmetry may depend on the general process of cyst polarization. One candidate for an asymmetric meiotic determinant is *Dacapo*, as it is found specifically in the oocyte nucleus in region 3 of the germarium. However, this asymmetric distribution is not observed at earlier stages, and a null mutant for *dacapo* does not affect meiotic progression in region 2 but only its maintenance in region 3. Many other proteins involved in cell-cycle control have been implicated in oocyte specification, thus confirming their influence on cell fate decisions. However, to date, no cell-cycle regulator has been found to be asymmetrically localized early enough to explain how the balance between meiosis and endoreplication is initially controlled. Moreover, how cell-cycle control influences oocyte cell fate decision remains unknown.

In this article, we show that the Polo kinase, one of the main regulators of the G2/M transition, interacts with *BicD* protein during oogenesis. Genetic analyses reveal interdependent functions between both proteins during early meiosis control and oocyte specification. As Polo plays a role in cell-cycle control and *BicD* plays a role in polarized transport to the future oocyte, we propose that their interaction reflects the existing link between meiosis and oocyte determination.

## MATERIALS AND METHODS

### Molecular biology

Plasmid constructs were generated by amplification of the desired fragments by PCR, which were sequenced and subcloned into appropriate vectors for yeast two-hybrid analysis (pp7 and pLex12, derived from the original pBTM116 and PGADGH, respectively) and *Drosophila* transgenes (pUASp) (Rorth, 1998). Details can be provided upon request.

### *Drosophila* strains and genetics

All the crosses were produced at 25°C using standard manipulation of fly genetics. Transgenic lines of UASp-polo construct were generated by standard methods and two independent lines were analyzed. Clonal analysis was performed with the FLP/FRT system (Xu and Rubin, 1993) using nuclear GFP as a clone marker.

### Yeast two-hybrid

The yeast two-hybrid screens were performed with Plk1 fragments as baits to screen a human placenta cDNA library using a previously described mating method (Formstecher et al., 2005).

### Immunostaining

Tissue stainings were performed according to standard procedures, using the primary antibodies at the following dilutions: rabbit anti-C(3)G antibody at 1/1000 (Hong et al., 2003; Lilly and Spradling, 1996); rabbit CP309 antibody 1/500 (Kawaguchi and Zheng, 2004); mouse anti-Polo MA294 1/10 (Llamazares et al., 1991); mouse anti-Hts 1B1 1/100 (Developmental Studies Hybridoma Bank); mouse anti-*BicD* 1B11 plus 4C2 at 1/50 each (Developmental Studies Hybridoma Bank). Cy3, Cy5 (Jackson ImmunoResearch) and Alexa 488-conjugated secondary antibodies (Molecular Probes) were used at 1/500.

### Ovary immunoprecipitation

Immunoprecipitation was performed as described in Navarro et al. (Navarro et al., 2004) using polyclonal anti-GFP antibody (Clontech). Details can be provided upon request.

## RESULTS

### The Polo kinase interacts with *BicD*

In a yeast two-hybrid screen we found an interaction between the human Polo protein (PLK1) and one of the two human homologs of *Drosophila BicD* (*BICD2*). Several clones corresponding to *BICD2* were obtained in screens with full-length PLK1 (11-596) and with its C-terminal regulatory domain (280-596). Positive clones defined a minimal interacting region corresponding to amino acids 129-326 of *BICD2*. We found a similar interaction between *BicD* amino acids 120-350 (corresponding to amino acids 124-358 of *BICD2*) and *Drosophila Polo*, which indicates that this interaction is conserved (Fig. 1A). The N-terminal kinase domain of Polo does not interact with *BicD* in a two-hybrid assay. The C-terminal regulatory part of Polo, named the Polo-Box domain, is a structural unit composed of two repeats (Polo-Boxes) and an alpha helix in the hinge region between the kinase domain and the Polo-Boxes (Cheng et al., 2003; Elia et al., 2003). Deletions at both extremities show that the entire Polo-Box domain is both necessary and sufficient for the two-hybrid interaction with *BicD* (Fig. 1A).

To date, the only link identified between *BicD* and cell cycle concerns entry into meiosis during *Drosophila* oogenesis (Huynh and St Johnston, 2000). Moreover, the interaction domain of *BicD* with Polo is particularly well conserved and has been shown to be functionally significant, especially during early oogenesis (Oh et al., 2000). Therefore, we tested the ability of both proteins to interact using co-immunoprecipitation on ovary extracts. We took advantage of flies containing a GFP-Polo transgene that has been shown to reproduce Polo expression and localization in all cell types analyzed, and to rescue *polo* mutants (Moutinho-Santos et al., 1999). Wild-type flies and flies constitutively expressing an NlsGFP protein were used as negative controls. Anti-GFP antibody efficiently precipitates both NlsGFP and GFP-Polo proteins but *BicD* was coprecipitated only with the GFP-Polo (Fig. 1B). This experiment shows that Polo and *BicD* proteins interact in vivo during *Drosophila* oogenesis.

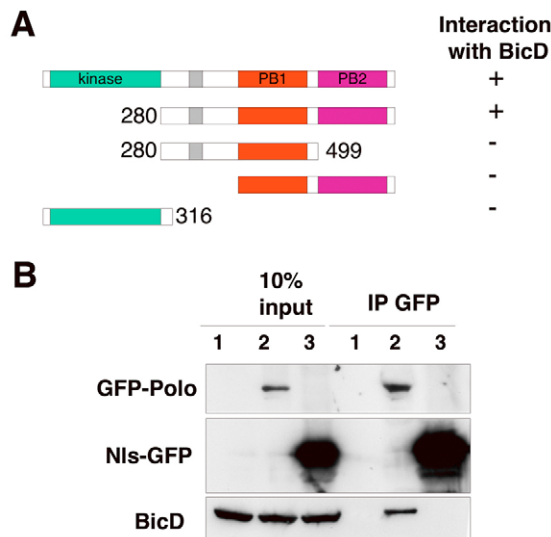

**Fig. 1. Interaction between BicD and Polo in two-hybrid and in vivo.** (A) Yeast two-hybrid interaction between Polo and the N-terminal part of BicD (amino acids 120-350). The whole Polo-Box domain [Polo-Boxes 1 and 2 (red) and a short helix represented in gray] but not the kinase domain (green) are required for the interaction. (B) Immunoprecipitation using anti-GFP antibodies (IP-GFP) from ovary extracts from wild-type (lane 1), GFP-Polo (lane 2) and Ubi-NlsGFP (lane 3) flies, showing BicD specifically coprecipitates with GFP-Polo (lane 2, IP-GFP).

### Polo is gradually restricted to meiotic cells during cyst polarization

We analyzed Polo localization during oogenesis using flies that were hemizygous for the GFP-Polo construct. In the germarium, Polo was strongly expressed in all the germline cells of region 1, suggesting that the presence of Polo is not cell-cycle-dependent (Fig. 2B). At the subcellular level, GFP-Polo accumulated in several cytoplasmic dots in each cell, generally at the nuclear periphery in region 1 (Fig. 2C). In region 2a, the dots became progressively less bright, except in the more central part of the cysts where they remained particularly intense (Fig. 2D). In regions 2b and 3, Polo was found in one or sometimes a few prominent dots at the posterior of the cyst (Fig. 2B,E). This localization was maintained until stages 2-3, and then became undetectable in the germline cells of later stages.

We compared this localization pattern with several markers of germarium structures. Polo accumulated in the pro-oocytes from region 2a and then in the oocyte in region 2b in a distribution similar to the BicD protein and centrosomes, although it did not colocalize with them (Fig. 2D). In region 3, centrosomes and BicD migrated to the posterior of the oocyte whereas Polo was found generally in its anterior or lateral region (Fig. 2E). We did not observe any significant colocalization between the fusome and Polo, although the Polo dots were often close to it in regions 2a and 2b (Fig. 2F,G,H). Importantly, a comparison of this pattern with SC staining revealed a correlation between the cells in meiosis and the cells that contained Polo speckles from regions 2a to 3 (Fig. 2F,G). The endogenous Polo protein showed a similar expression and localization pattern as the one obtained with GFP-Polo, especially the preferential accumulation in the germ cells that have entered meiosis (Fig. 2I,J). Finally, in situ hybridization of the endogenous *polo* mRNA revealed that this gene was strongly expressed in the germline in region 1 and that no specific accumulation in the oocyte was detected

in the following steps (Fig. 2K). This indicates that the asymmetric distribution of the Polo protein is not due to the localization of its mRNA.

### BicD and the Dynein complex are required for meiosis and Polo localization

As Polo interacts with BicD and localizes to the oocyte, we tested whether Polo localization is dependent on BicD and we compared this localization to meiosis progression. First, germline clones of an amorph *BicD* allele (*BicD<sup>r5</sup>*) in flies expressing GFP-Polo showed a staining for the SC component C(3)G in all cells of a cyst in region 2a (Fig. 3A). However, this staining was weaker than that observed in pro-oocytes of wild-type cysts and did not have the typical morphology of wild-type SCs even if thread-like structures were observed. C(3)G was no longer detectable in regions 2b and 3. This reveals that, in the complete absence of BicD, all cystocysts enter meiosis but do not progress to the full pachytene and instead revert back to an endoreplicative nurse cell fate. A similar phenotype was observed in the absence of the GFP-Polo transgene, indicating that entry into meiosis in the absence of BicD was not due to overexpression of Polo (data not shown). This result differs from a previous report in which the absence of another SC epitope in *BicD<sup>r5</sup>* clones led the authors to conclude that BicD was required to initiate SC formation (Huynh and St Johnston, 2000). This suggests that during meiosis this unknown protein is recruited later to the SC than C(3)G. In *BicD<sup>r5</sup>* clones, Polo has a normal spotted distribution in region 1 of the germarium (Fig. 3A), indicating that this peculiar subcellular localization of Polo is independent of BicD. However, GFP-Polo dots were found in all the cells of the cysts in region 2a (Fig. 3A), and they became undetectable in regions 2b and 3 instead of accumulating in one cell of the cyst.

We also analyzed GFP-Polo localization and meiotic progression in the hypomorphic mutant *BicD<sup>PA66</sup>*. The resulting mutant BicD protein retains some function but fails to localize and accumulate in the presumptive oocyte, leading to the formation of cysts containing 16 nurse cells (Suter and Steward, 1991) (Fig. 6A). In region 2a of *BicD<sup>PA66</sup>* germaria, meiosis initiated properly in two to four cells per cyst indicating that a detectable active transport of BicD protein is not required for this process (Fig. 3B). Then, in region 2b, the number of SC-positive cells varied from 0 to 2 depending on the cyst, but we rarely observed cysts with only one meiotic cell (2/31). Cysts positive for SCs in region 3 were an exception (see below). This strongly suggests that BicD is required in the presumptive oocyte for the normal restriction of meiosis to this cell. In the *BicD<sup>PA66</sup>* mutant, GFP-Polo dots failed to properly accumulate in the central part of the cysts in regions 2a and 2b, and were not found in the presumptive pro-oocyte. Polo was not detected in region 3 of *BicD<sup>PA66</sup>* germaria. Among 186 analyzed *BicD<sup>PA66</sup>*, only one contained GFP-Polo dots in a cyst of region 3 and it was also the only one that had SC-positive cells (data not shown).

BicD function during oogenesis is also dependent on Egl and the Dynein complex (Mach and Lehmann, 1997; Bolivar et al., 2001). To confirm that Polo localization depends on BicD function in polarized transport, we also investigated Polo localization in an *egl* null background. Polo localization and meiotic progression always showed the same defects as in BicD null mutants (Fig. 3C). We also generated germline clones for a null mutant of the Dynein complex component *dynamitin* (*dnn*) (Januschke et al., 2002). In a similar way to *BicD* and *egl* loss-of-function mutants, the absence of Dnn resulted in Polo failing to accumulate in one cell of the cyst (Fig. 3D). In most of the *dnn* clones, meiosis started normally in four cells and was then restricted to the two pro-oocytes in region 2a. However,



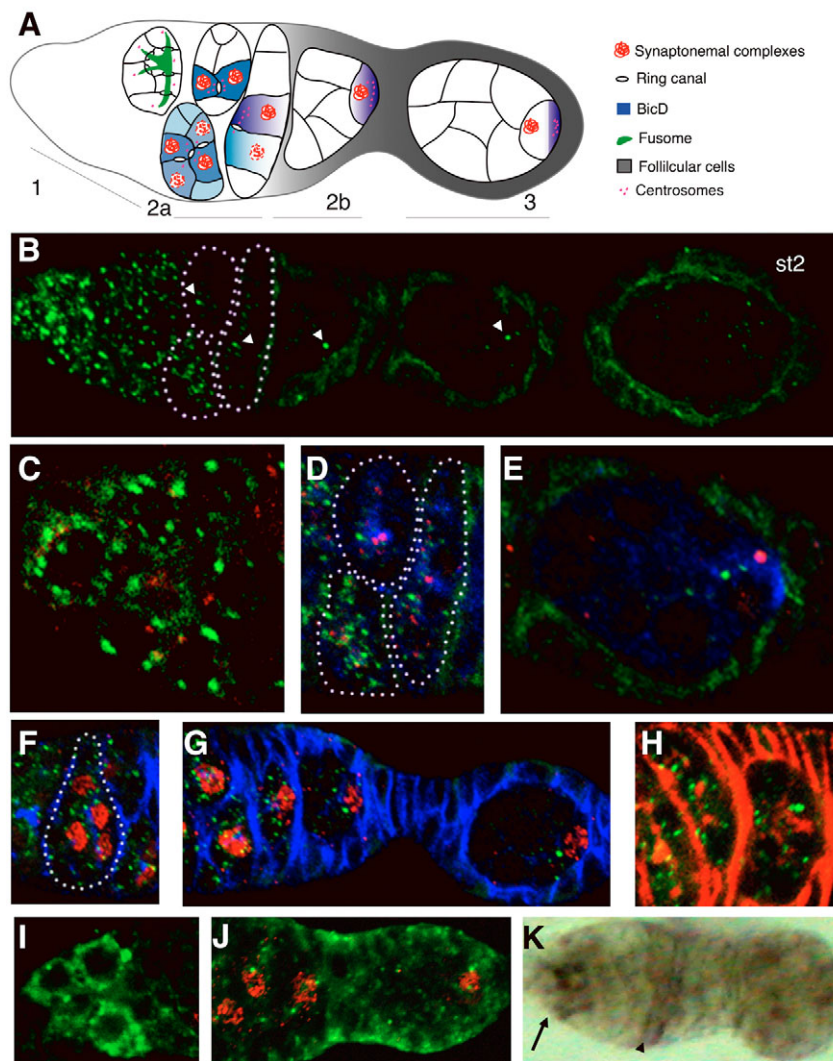

**Fig. 2. Polo localization during the early steps of oogenesis.** (A) Schematic representation of a *Drosophila* ovarium focusing on oocyte determination and meiosis progression. (B) General view of GFP-Polo expression (green) in a germarium and a stage 2 follicle. Arrowheads indicate Polo spots in region 2 and 3. (C-E) Enlargements of (B). (C) In region 1, Polo is found in many dots in each interphase germline cell, but is not colocalized with centrosomes (CP309, red). (D) In region 2a, Polo dots are progressively restricted to the pro-oocytes but do not show colocalization with BicD (blue) or centrosomes (red). (E) In region 3, Polo is found at the anterior or lateral part of the oocyte whereas BicD and centrosomes are in the posterior region. (F,G) A germarium expressing GFP-Polo (green) stained for SCs [C(3)G, red] and fusome and follicular cells (Hts, blue). Polo concentrates in meiotic cells from region 2a (F) to region 3 / stage 1 follicle (G). (H) Single confocal section of cysts in region 2 showing that GFP-Polo (green) is not localized on the remnant fusome (red). (I,J) Endogenous Polo protein (green) co-stained with SCs (red) shows a similar dynamic localization to GFP-Polo in regions 1 (I), 2 and 3 (J) of the germarium. (K) *polo* mRNA in situ hybridization. Strong expression of *polo* is detected in the germline in region 1 of germarium (arrow) and in follicle cells in region 2a (arrowhead).

*dmn* cysts in region 2b contained 0, 1 or 2 C(3)G-positive cells, similar to *BicD*<sup>PA66</sup> ovaries (Fig. 3D). Meiosis was never observed in region 3 and cysts systematically failed to form an oocyte. Together, these results show that Polo localization and the restriction of meiosis to the oocyte are progressive processes throughout region 2a, and that both are dependent on a polarized transport to the oocyte.

### ***polo* mutants affect meiosis progression and BicD-dependent transport**

As changes in Polo localization were correlated with meiosis progression in wild-type conditions as well as in different mutant backgrounds, we asked whether Polo could influence this process. As *polo* is required for cell viability and division, we took advantage of the hypomorphic allele *polo*<sup>1</sup> to study the effect of its loss of function during oogenesis (Sunkel and Glover, 1988). This allele was associated in trans with a chromosomal deficiency covering the *polo* locus (*Df(3L)rdgc-cos2*) or the strong alleles *polo*<sup>9</sup> or *polo*<sup>16-1</sup> (Donaldson et al., 2001). These three different genotypes gave identical phenotypes that were completely rescued by one GFP-Polo transgene. In *polo* cysts, C(3)G staining was usually found in only a few spots in each cyst in region 2a (Fig. 4B,B'). By contrast, cysts in region 2b contained two to four cells with normal SCs reaching

the pachytene, which in wild type is typical for region 2a, indicating a significant delay in meiosis entry and in the restriction to one cell. C(3)G was still present in at least two cells in region 3, thus confirming the delay of meiosis restriction to one cell (Fig. 4B,B'). However, the staining intensity for C(3)G is reduced in region 3 compared with wild type, and the protein was only found in a few small dots per nucleus. Surprisingly, in later stages, meiosis was restricted to the oocyte and the SCs appeared normal. In conclusion, partial loss of Polo function led to two distinct phenotypes during the first steps of meiosis. On the one hand, it is involved in the initiation of SC formation and in their maintenance in the oocyte. On the other hand, it is also involved in the restriction of meiosis to the oocyte.

We also investigated oocyte differentiation in *polo* mutants using the BicD protein itself as a reporter. In wild-type conditions, BicD started to accumulate in the pro-oocytes as early as region 2a, and was globally restricted to the future oocyte when the cysts entered region 2b (Fig. 4A,A'). When the cysts progressed into region 3, BicD migrated from the anterior to the posterior margin of the oocyte, indicating its antero-posterior polarization. In cysts with a partial loss of Polo function, BicD failed to accumulate in pro-oocytes of region 2a (Fig. 4B,B'). However, the accumulation of BicD was only delayed, as it started properly in region 2b. In region

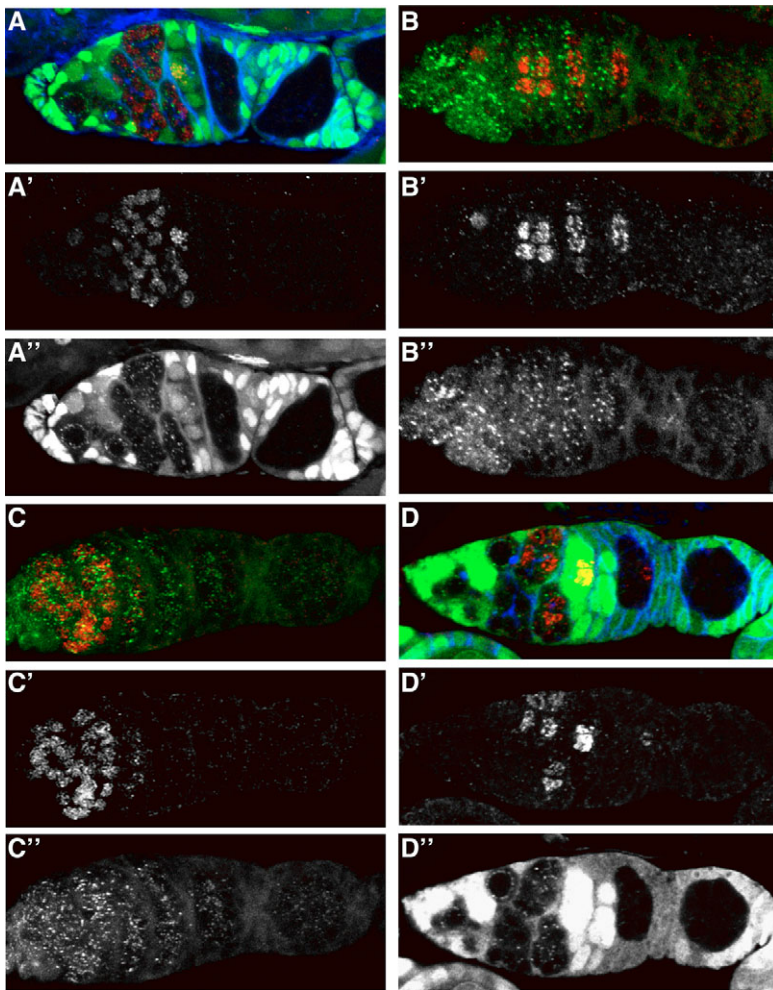

**Fig. 3. Polo localization is dependent on *BicD*, *egl* and the Dynein complex.** (A) *BicD*<sup>5</sup> germline clones marked by the absence of NlsGFP. (B) *BicD*<sup>PA66</sup> homozygous germline. (C) *egl*<sup>mu50/RCT2</sup> ovariolo and (D) *dmn*<sup>K16109</sup> germline clones marked by the absence of GFP. In A to D, the first images show SCs (red, white in the second picture), GFP-Polo (green dots, white in the third picture) plus NlsGFP (green nuclei, white nuclei in the third picture) and Hts (blue) in A and D. Polo localization is not restricted in any of these different genotypes, and the meiosis is not maintained in any cell of the cyst (at least 50 mutant cysts were scored for each genotype). In *BicD* (A) and *egl* (C) null mutants, meiosis starts in all the cells in region 2a whereas in *BicD*<sup>PA66</sup> (B) and *dmn* (D) mutants normal initiation of meiosis in two to four cells is observed.

3, *BicD* remained at the anterior of the oocyte, but this polarization defect was corrected in later stages indicating that it corresponds to a delay in oocyte differentiation. We did not observe important changes in microtubule organization in *polo* mutant cysts suggesting that Polo does not act through a direct effect on the microtubule network. However, DNA and *BicD* staining revealed that, in less than 1% of cases, hypomorphic *polo* mutations led to cysts without an oocyte and with 16 endoreplicative nurse cells, confirming that *polo* is involved in meiosis and oocyte differentiation (data not shown).

We produced germline clones for the null allele *polo*<sup>0</sup>. Unfortunately, we did not find germline cysts in which all cells were homozygous mutant, probably due to the function of Polo during mitotic division. Thus, we could not test the effect of a complete depletion of Polo activity on meiosis progression and oocyte determination. We observed 48 mosaic cysts; among them ten contained a single mutant cell and all of them presented the same phenotype (Fig. 4C). DNA staining indicates that the endoreplication has occurred normally in this single *polo* mutant nurse cell. However, *BicD* was present in this cell at higher level than in neighboring cells, although its anterior position indicated that it was not one of the four initial meiotic cells. This strongly suggests that Polo is autonomously required in each cell of the cyst for transport of the *BicD* protein to the oocyte, and that this function is independent of its possible role in meiosis.

### Polo overexpression affects meiosis progression and oocyte differentiation

As loss of Polo function seems to indicate that Polo is required for meiosis, we wondered whether Polo might act as a trigger for meiosis when overexpressed. Polo overexpression in the germline was obtained in two ways. On the one hand, we used flies that were homozygous for the GFP-Polo transgene in a wild-type context for endogenous *polo*. On the other hand, we produced flies in which a UAS-*polo* construct was specifically expressed in the germline. Similar phenotypes were observed in both lines. First, in region 2a we observed that approximately half of the cysts had more than four cells containing SC with, generally, six to eight cells in meiosis (Fig. 5A). Thus, Polo overexpression can induce more cells of a cyst to enter meiosis than is seen in the wild type. Furthermore, in regions 2b and 3, cysts always contained at least two cells with SC. In some cases, cysts in region 3 still contained four C(3)G-positive cells (Fig. 5). The restriction of meiosis to one cell eventually occurs during stages 3-5. Observation of Polo distribution itself gave further insight into this phenotype. Intense spots of GFP-Polo were observed in more than one cell per cyst, even in regions 2b and 3 (Fig. 5B,B'''). Moreover, the presence of intense GFP-Polo spots correlated with the presence of C(3)G-positive cells. Finally, Polo became restricted to the oocyte at the same time as meiosis during vitellogenic stages. Surprisingly, increased Polo function led to defects in oocyte differentiation similar to those caused by partial



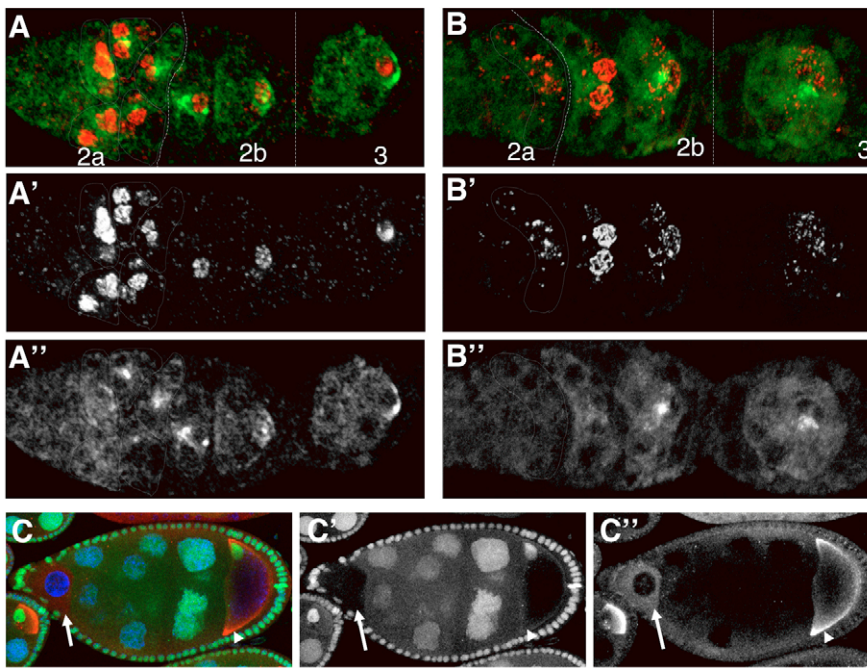

**Fig. 4. Loss of function of Polo affects meiotic progression and BicD polarized transport.** (A) A wild-type germarium stained for SCs (red, white in A') and BicD (green, white in A'). SC formation is initiated in two to four cells in region 2a, and is then restricted to one cell in region 2b. BicD accumulation in meiotic cells begins in region 2a. Through region 2b, BicD redistributes to the posterior of the oocyte. (B) A *polo<sup>1</sup>/polo<sup>9</sup>* germarium. Meiosis does not initiate properly in region 2a. Cysts often contain abnormal SCs, and meiosis restriction to one cell is delayed. BicD starts to accumulate in pro-oocytes only in region 2b. In region 3, BicD is still at the anterior of the oocyte. (C) A mosaic *polo<sup>9</sup>* follicle at stage 7 with a single mutant cell (arrow) marked by the absence of nuclear GFP (green, white in C'). In this nurse cell, the amount of BicD protein (red, white in C') is higher than in the neighboring wild-type nurse cells, but lower than in the oocyte (arrowhead). DNA is shown in blue.

loss of function: delay in the accumulation of BicD in the oocyte and early polarization of the oocyte (Fig. 5B''). These results show that Polo overexpression leads to a delay in its own localization to the oocyte, probably because its overabundance exhausts the process leading to its asymmetric distribution. Polo overexpression also induced defects in the initiation and restriction of meiosis, and these defects correlated with Polo localization. As in the case of partial loss of *polo* function, these data strongly suggest that Polo is involved in the initiation, maintenance and restriction to one cell of meiosis. Our data suggest that meiosis is controlled by the level of the Polo protein in each cell of the cyst, and that the specific localization of Polo to the oocyte is required for meiosis restriction.

#### Overexpression of Polo restores BicD<sup>PA66</sup> localization and function during oocyte differentiation

We reasoned that if Polo contributes to the activation of BicD-dependent transport early in oogenesis, the overexpression of Polo might rescue *BicD<sup>PA66</sup>* mutants. As described previously, *BicD<sup>PA66</sup>* is a hypomorphic allele that does not interfere with the initiation of meiosis in four cells, but blocks oocyte differentiation and the restriction of meiosis to one cell, leading to a 16 polyploid nurse cell terminal phenotype. Moreover, the BicD<sup>PA66</sup> protein does not localize to the oocyte but remains diffuse in all cells of a cyst (Fig. 6A) (Suter and Steward, 1991). BicD<sup>PA66</sup> shows a decreased level of phosphorylation, which is probably responsible for its reduced functional activity. When we overexpressed a UAS-Polo in a *BicD<sup>PA66</sup>* mutant germline, we observed that the follicles contained an oocyte at their posterior (Fig. 6B,C), and that SCs were present in every cyst from region 2 of the germarium until stage 6 follicles (Fig. 6B). All of the control *BicD<sup>PA66</sup>* follicles examined ( $n=224$ ) had 16 nurse cells, whereas 98% of *BicD<sup>PA66</sup>* follicles overexpressing Polo ( $n=238$ ) had an identifiable oocyte. BicD localized preferentially to the posterior of the oocyte in these follicles (Fig. 6B), although not as well as in wild-type follicles. Eventually, this posterior localization of BicD was not maintained beyond stages 3 or 4 of oogenesis, and germ cells of these cysts degenerated at about

stage 8 of oogenesis (Fig. 6C). As BicD localization is dependent on its own function in polarized transport, these data indicate that overexpression of Polo in the germ cells is able to suppress the early phenotypes of *BicD<sup>PA66</sup>* and to restore its ability to mediate polarized transport to the oocyte. This confirms that Polo has a direct role in regulating the polarized transport in germline cells and suggests that this function is mediated by BicD.

#### DISCUSSION

Recent studies on oocyte determination and on the control of meiosis have pointed out that both mechanisms are closely linked, although the nature of these links remains unknown. Our analysis of the physical and functional interaction between BicD and Polo reveals a new function for Polo and contributes to a better understanding of meiosis control, meiosis restriction and oocyte differentiation. Our data allow us to propose a model for explaining the links between meiosis and oocyte differentiation.

#### Polo localization to the oocyte requires BicD-dependent polarized transport

This paper describes the localization of the Polo protein and its genetic control in the *Drosophila* germline during early oogenesis. Polo has a peculiar subcellular localization in cytoplasmic dots that do not correspond to any well-known structures of germline cysts or to microtubule minus-ends where BicD accumulates. Polo has previously been described as colocalizing with several subcellular structures depending on cell cycle phase (Barr et al., 2004), but none of these corresponds to the localization observed in the present study. Similar cytoplasmic dots were observed in the primordial germline cells of the *Drosophila* embryo as soon as they were formed, suggesting that this unusual localization could be a specific feature of the germline (Moutinho-Santos et al., 1999).

From region 2a onward, Polo dots are present mostly in the cells containing SCs. This is the first report of a cell-cycle regulator whose localization is spatially and temporally correlated with meiotic progression during early oogenesis. Moreover this correlation is still conserved in mutants that affect polarized transport and the

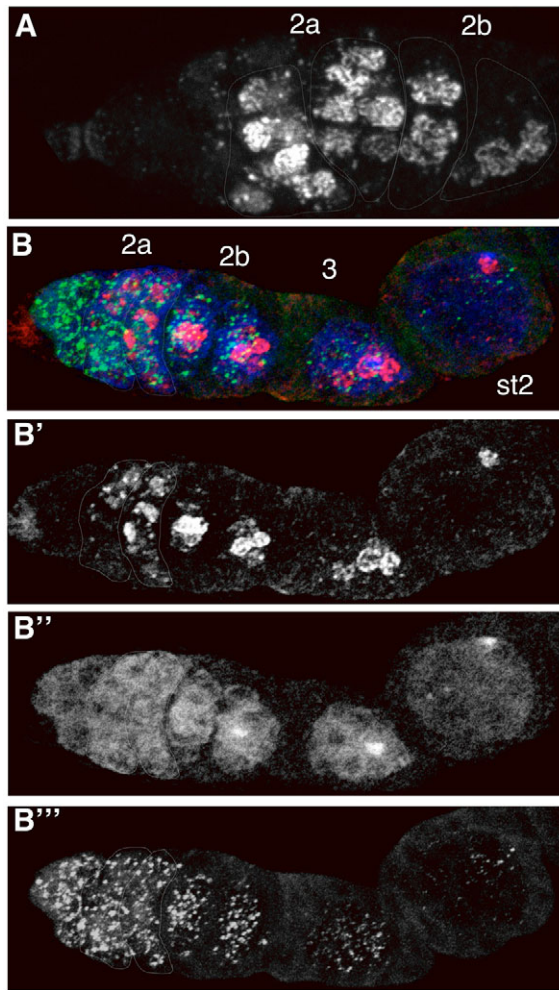

**Fig. 5. Polo overexpression affects meiosis progression and oocyte differentiation.** (A) UAS-Polo overexpression with a germline-specific driver leads to the formation of SCs (white) in more than four cells per cyst in region 2a, and to a delay in meiotic restriction in region 2b. (B) Overexpression of GFP-Polo. C(3)G (red, white in B'), BicD (blue, white in B''), and GFP-Polo (green, white in B'''). (B') Meiosis can initiate in more than four cells, and cysts in region 3 still contain four cells in meiosis, thus indicating a strong delay in meiosis restriction to one cell. (B'') Polo overexpression leads to a delay in BicD accumulation in the oocyte and localization to the posterior of the oocyte. (B''') Cysts from region 2a to region 3 contain an unusually high number of Polo dots that are not restricted to one cell. There is a correlation between cells containing the strongest Polo speckles and meiotic cells in the cyst in region 3.

restriction and maintenance of meiosis. This indicates that Polo localization is dependent on polarized transport. One possibility is that Polo itself is directly transported to the oocyte. This hypothesis is reinforced by the physical interaction between BicD and Polo proteins, according to the proposed function of BicD as adapter for Dynein cargos. However, the BicD-dependent localization of Polo is not sufficient to explain its expression profile. Polo is strongly expressed in region 1 of the germarium, and the overall amount of the protein in the cyst progressively decreases, becoming undetectable after stage 2. This degradation seems to be compensated in meiotic cells and then in the oocyte by the polarized transport. The progressive degradation of Polo is also observed in

*egl* and *BicD* null mutants. Degradation in association with a complete absence of Polo transport may explain why all the cells of a cyst enter into meiosis in these mutants (all the cells contain the same amount of Polo), and then exit meiosis simultaneously (none of the cells preferentially accumulates enough Polo). Alternatively, rather than by direct transport of Polo to the oocyte, its asymmetric distribution in the cyst could be due to a differential control of its stability between nurse cells and oocyte under the control of the BicD-dependent polarized transport.

### The initial restriction of meiosis requires a dynein-independent BicD function

*BicD* and *egl* null mutants showed a very similar phenotype, in which all 16 cells of a cyst first enter into meiosis but subsequently lose the SCs. This phenotype cannot be compared with null mutants of the *dhc*, as Dynein is required at earlier steps of cyst formation. The human homolog of BicD interacts directly with Dynamitin, and this interaction is thought to mediate the interaction of BicD with the Dynein complex (Hoogenraad et al., 2001). In contrast to BicD, Dynamitin is not involved in the initial restriction of meiosis, showing that the interaction of BicD with Dynamitin, and thus probably Dynein, is not required for the initial restriction of meiosis. In a similar way, *LC8* null mutants or *egl* mutants that specifically block the interaction between Egl and LC8 do not interfere with the initiation of meiosis in only four cells (Navarro et al., 2004). We found that transport of the BicD protein between the cyst cells is apparently not required for this first step, as the *BicD*<sup>PA66</sup> allele or drug-induced microtubule depolymerization does not affect this initial restriction, although BicD is diffuse throughout the entire cyst (see Results) (see also Huynh and St Johnston, 2000). Finally, a null mutant for the plakin *shot*, which has been proposed to be an essential upstream component of the Dynein function in centrosome migration, exhibits variable meiotic phenotypes but allows a normal initial restriction of meiosis to four cells (Roper and Brown, 2004). These data are consistent with a function of BicD and Egl independent of Dynein in the initial restriction of meiosis.

### Polo is involved in the control of meiosis

Polo is involved in many crucial steps of the cell cycle, including the G2/M transition of mitosis and meiosis processes (reviewed by Barr et al., 2004). Here, we show that hypomorphic *polo* alleles lead to a delay in meiotic entry and that Polo overexpression can trigger meiosis in more than four cells per cyst in region 2a. These phenotypes could be related to the function of Polo in the G2/M transition. In vertebrates, Polo is an activator of the String/CDC25 phosphatase, and it has also been proposed that Polo can repress the kinases Myt1 and Wee1. String is the main activator of the cyclinB/CDC2 complex, the activity of which triggers the G2/M transition, whereas Myt1 and Wee are repressors of this complex. However, the role of the cyclin B and CDC25 in meiosis in *Drosophila* oogenesis is not yet well understood because, for example, CDC25 seems to act as a negative regulator of meiotic oocyte cell fate (Mata et al., 2000). Further investigations will be needed to determine how Polo triggers meiotic entry during early oogenesis.

We have shown that in mutants with partial loss of *polo* function, SCs start to disassemble in region 3 but are well formed again in stage 2/3 before disappearing in the following stages. One possible hypothesis to explain how meiosis is finally properly maintained in *polo* hypomorphic mutants is that the repression of cyclin E by Dacapo during stage 2/3 represses endoreplication,



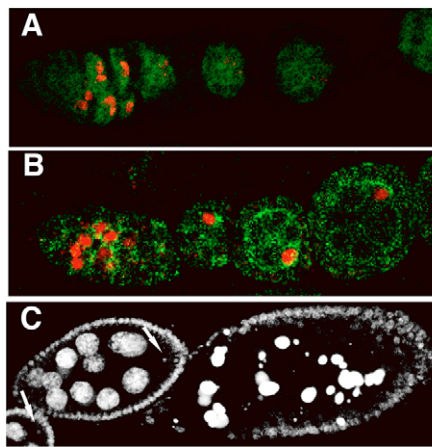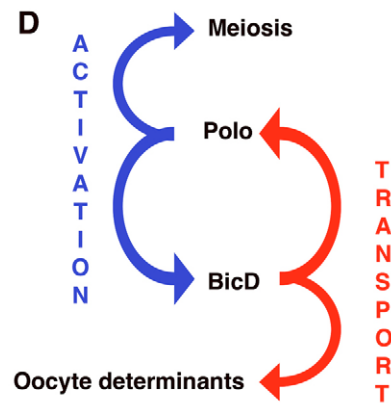

**Fig. 6. Polo overexpression restores BicD<sup>PA66</sup> protein function during early oogenesis.** (A,B) C(3)G is in red and BicD in green. (A) BicD<sup>PA66</sup> ommatidium with no cell in meiosis from stage 2b of the germarium, and diffuse localization of BicD. (B) BicD<sup>PA66</sup> ommatidium overexpressing Polo. Each follicle contains an oocyte in meiosis, which accumulates BicD. (C) DNA staining of later stage follicles in a BicD<sup>PA66</sup> ommatidium overexpressing Polo. Stage 4 and stage 6 follicles contain an oocyte marked by the presence of the condensed DNA (arrowheads). The follicle at stage 9 is degenerating. (D) Model of a positive feedback loop between Polo and BicD proteins during meiosis restriction and oocyte differentiation. The Polo kinase is required to trigger meiosis and to activate BicD-dependent transport. In turn, BicD is required for the transport of oocyte determinants and for Polo localization.

and thus allows meiotic progression (Hong et al., 2003). This is consistent with the finding that the specific localization of Dacapo to the oocyte and its requirement for meiosis maintenance begins only in region 3. Moreover, null mutations of *dacapo* do not lead to a fully penetrant 16-nurse-cell phenotype, confirming the existence of a partially redundant control. Therefore, we propose that the balance in favor of meiosis is initially due to the localized activation of meiosis by Polo, and later to the localized inhibition of endoreplication by Dacapo, and that both mechanisms partially overlap.

### Polo is involved in polarized transport and oocyte determination

We also observed that Polo is required for the normal restriction of meiosis. Moreover, the defects in the restriction of meiosis caused by both loss and gain of polo function are correlated with defects in oocyte determination. As described previously, meiosis restriction and oocyte specification both depend on the Dynein complex and the BicD polarized transport system. Thus, we assume that these Polo phenotypes indicate that Polo is involved in polarized transport. This role may be indirect and thus reveals the influence of meiosis and cell-cycle control on oocyte differentiation. Such influence has been observed in situations where there is activation of the meiotic checkpoint due to a failure in DNA double-strand break repair (Gonzalez-Reyes et al., 1997; Ghabrial et al., 1998). However, at least two results argue for a direct role of Polo in polarized transport, independently of its meiotic function. First, in mosaic germline cysts, nonmeiotic cells mutant for *polo* retain BicD protein. Thus, this phenotype cannot be due to the activation of the meiotic checkpoint. This strongly suggests that Polo is required in each cell of the cyst to initiate BicD-dependent transport to the presumptive oocyte. Second, the overexpression of Polo is able to restore the localization and therefore the function of BicD<sup>PA66</sup> protein. Interestingly, this mutant allele is due to a single amino acid substitution (A40V) that leads to a hypophosphorylation of BicD, and genetic evidence indicates that this phosphorylation is crucial for BicD function (Suter and Steward, 1991). Polo overexpression might restore a functional level of BicD<sup>PA66</sup> phosphorylation. Therefore, even if we failed to observe significant change in the gel mobility of BicD in *polo* hypomorph mutants, it is tempting to propose that the function of Polo in the polarized transport could be to activate, directly or indirectly, BicD by phosphorylation.

### A model for oocyte determination and meiosis control

Taken together, our results lead us to propose a model that can explain a reciprocal requirement between the control of meiosis and oocyte specification (Fig. 6C). This model is based on four major points. First, BicD is required for the Dynein-dependent polarized transport of oocyte determinants. Second, BicD is also required for the progressive localization of Polo to the oocyte. Third, Polo appears to trigger meiosis in the germarium. Fourth, Polo is required to activate the BicD and Dynein-dependent polarized transport. These findings suggest the existence of a positive feedback loop between Polo and BicD proteins, and therefore between oocyte specification and meiosis.

We thank Jacques Camonis and Laurent Daviet for discussions during the course of this work, Daniel St Johnston and Dorothea Godt for comments on the manuscript, and all the staff at Hybrigenics for their contributions. We are grateful to Antoine Guichet, David Glover, Mary Lilly, Ruth Lehmann, Claudio Sunkel, Ruth Steward and the Bloomington Stock Center for providing fly strains and reagents. This research was supported by the Institut National de la Santé et de la Recherche Médicale, by a GenHomme network Grant to Hybrigenics and by the Institut Curie. V.M. received support from the Association pour la recherche sur le cancer.

### References

- Barr, F. A., Sillje, H. H. and Nigg, E. A. (2004). Polo-like kinases and the orchestration of cell division. *Nat. Rev. Mol. Cell Biol.* **5**, 429-440.
- Bolivar, J., Huynh, J. R., Lopez-Schier, H., Gonzalez, C., St Johnston, D. and Gonzalez-Reyes, A. (2001). Centrosome migration into the *Drosophila* oocyte is independent of BicD and egl, and of the organisation of the microtubule cytoskeleton. *Development* **128**, 1889-1897.
- Carpenter, A. T. (1975). Electron microscopy of meiosis in *Drosophila melanogaster* females. I. Structure, arrangement, and temporal change of the synaptonemal complex in wild-type. *Chromosoma* **51**, 157-182.
- Cheng, K. Y., Lowe, E. D., Sinclair, J., Nigg, E. A. and Johnson, L. N. (2003). The crystal structure of the human polo-like kinase-1 polo box domain and its phospho-peptide complex. *EMBO J.* **22**, 5757-5768.
- Clark, K. A. and McKearin, D. M. (1996). The *Drosophila* stonewall gene encodes a putative transcription factor essential for germ cell development. *Development* **122**, 937-950.
- Cox, R. T. and Spradling, A. C. (2003). A Balbiani body and the fusome mediate mitochondrial inheritance during *Drosophila* oogenesis. *Development* **130**, 1579-1590.
- de Cuevas, M. and Spradling, A. C. (1998). Morphogenesis of the *Drosophila* fusome and its implications for oocyte specification. *Development* **125**, 2781-2789.
- de Cuevas, M., Lee, J. K. and Spradling, A. C. (1996). alpha-spectrin is required for germline cell division and differentiation in the *Drosophila* ovary. *Development* **122**, 3959-3968.
- Donaldson, M. M., Tavares, A. A., Ohkura, H., Deak, P. and Glover, D. M.



- (2001). Metaphase arrest with centromere separation in polo mutants of *Drosophila*. *J. Cell Biol.* **153**, 663-676.
- Elia, A. E., Rellos, P., Haire, L. F., Chao, J. W., Ivins, F. J., Hoepker, K., Mohammad, D., Cantley, L. C., Smerdon, S. J. and Yaffe, M. B.** (2003). The molecular basis for phosphodependent substrate targeting and regulation of Plks by the Polo-box domain. *Cell* **115**, 83-95.
- Ephrussi, A., Dickinson, L. K. and Lehmann, R.** (1991). Oskar organizes the germ plasm and directs localization of the posterior determinant nanos. *Cell* **66**, 37-50.
- Formstecher, E., Aresta, S., Collura, V., Hamburger, A., Meil, A., Trehin, A., Reverdy, C., Betin, V., Maire, S., Brun, C. et al.** (2005). Protein interaction mapping: a *Drosophila* case study. *Genome Res.* **15**, 376-384.
- Ghabrial, A., Ray, R. P. and Schupbach, T.** (1998). *okra* and spindle-B encode components of the RAD52 DNA repair pathway and affect meiosis and patterning in *Drosophila* oogenesis. *Genes Dev.* **12**, 2711-2723.
- Gonzales-Reyes, A., Elliott, H. and St Johnston, D.** (1997). Oocyte determination and the origin of polarity in *Drosophila*: the role of the spindle genes. *Development* **124**, 4927-4937.
- Hong, A., Lee-Kong, S., Iida, T., Sugimura, I. and Lilly, M. A.** (2003). The p27Cip/kip ortholog *dacapo* maintains the *Drosophila* oocyte in prophase of meiosis I. *Development* **130**, 1235-1242.
- Hoogenraad, C. C., Akhmanova, A., Howell, S. A., Dortland, B. R., De Zeeuw, C. I., Willemsen, R., Visser, P., Grosveld, F. and Galjart, N.** (2001). Mammalian Golgi-associated Bicaudal-D2 functions in the dynein-dynactin pathway by interacting with these complexes. *EMBO J.* **20**, 4041-4054.
- Huynh, J. R. and St Johnston, D.** (2000). The role of BicD, Egl, Orb and the microtubules in the restriction of meiosis to the *Drosophila* oocyte. *Development* **127**, 2785-2794.
- Huynh, J. R. and St Johnston, D.** (2004). The origin of asymmetry: early polarisation of the *Drosophila* germline cyst and oocyte. *Curr. Biol.* **14**, R438-R449.
- Huynh, J. R., Shulman, J. M., Benton, R. and St Johnston, D.** (2001). PAR-1 is required for the maintenance of oocyte fate in *Drosophila*. *Development* **128**, 1201-1209.
- Januschke, J., Gervais, L., Dass, S., Kaltschmidt, J. A., Lopez-Schier, H., St Johnston, D., Brand, A. H., Roth, S. and Guichet, A.** (2002). Polar transport in the *Drosophila* oocyte requires Dynein and Kinesin I cooperation. *Curr. Biol.* **12**, 1971-1981.
- Kawaguchi, S. and Zheng, Y.** (2004). Characterization of a *Drosophila* centrosome protein CP309 that shares homology with Kendrin and CG-NAP. *Mol. Biol. Cell* **15**, 37-45.
- Keyes, L. N. and Spradling, A. C.** (1997). The *Drosophila* gene *fs(2)cup* interacts with *otu* to define a cytoplasmic pathway required for the structure and function of germ-line chromosomes. *Development* **124**, 1419-1431.
- Lilly, M. A. and Spradling, A. C.** (1996). The *Drosophila* endocycle is controlled by Cyclin E and lacks a checkpoint ensuring S-phase completion. *Genes Dev.* **10**, 2514-2526.
- Lin, H. and Spradling, A. C.** (1995). Fusome asymmetry and oocyte determination in *Drosophila*. *Dev. Genet.* **16**, 6-12.
- Lin, H., Yue, L. and Spradling, A. C.** (1994). The *Drosophila* fusome, a germline-specific organelle, contains membrane skeletal proteins and functions in cyst formation. *Development* **120**, 947-956.
- Llamazares, S., Moreira, A., Tavares, A., Girdham, C., Spruce, B. A., Gonzalez, C., Karess, R. E., Glover, D. M. and Sunkel, C. E.** (1991). polo encodes a protein kinase homolog required for mitosis in *Drosophila*. *Genes Dev.* **5**, 2153-2165.
- Mach, J. M. and Lehmann, R.** (1997). An Egalitarian-BicaudalD complex is essential for oocyte specification and axis determination in *Drosophila*. *Genes Dev.* **11**, 423-435.
- Mata, J., Curado, S., Ephrussi, A. and Rorth, P.** (2000). Tribbles coordinates mitosis and morphogenesis in *Drosophila* by regulating string/CDC25 proteolysis. *Cell* **101**, 511-522.
- Moutinho-Santos, T., Sampaio, P., Amorim, I., Costa, M. and Sunkel, C. E.** (1999). In vivo localisation of the mitotic POLO kinase shows a highly dynamic association with the mitotic apparatus during early embryogenesis in *Drosophila*. *Biol. Cell* **91**, 585-596.
- Navarro, C., Puthalakath, H., Adams, J. M., Strasser, A. and Lehmann, R.** (2004). Egalitarian binds dynein light chain to establish oocyte polarity and maintain oocyte fate. *Nat. Cell Biol.* **6**, 427-435.
- Oh, J., Baksa, K. and Steward, R.** (2000). Functional domains of the *Drosophila* bicaudal-D protein. *Genetics* **154**, 713-724.
- Page, S. L. and Hawley, R. S.** (2001). c(3)G encodes a *Drosophila* synaptonemal complex protein. *Genes Dev.* **15**, 3130-3143.
- Ran, B., Bopp, R. and Suter, B.** (1994). Null alleles reveal novel requirements for Bic-D during *Drosophila* oogenesis and zygotic development. *Development* **120**, 1233-1242.
- Riechmann, V. and Ephrussi, A.** (2001). Axis formation during *Drosophila* oogenesis. *Curr. Opin. Genet. Dev.* **11**, 374-383.
- Roper, K. and Brown, N. H.** (2004). A spectraplakins is enriched on the fusome and organizes microtubules during oocyte specification in *Drosophila*. *Curr. Biol.* **14**, 99-110.
- Rorth, P.** (1998). Gal4 in the *Drosophila* female germline. *Mech. Dev.* **78**, 113-118.
- Schupbach, T. and Wieschaus, E.** (1991). Female sterile mutations on the second chromosome of *Drosophila melanogaster*. II. Mutations blocking oogenesis or altering egg morphology. *Genetics* **129**, 1119-1136.
- Spradling, A. C.** (1993). Developmental genetics of oogenesis. In *The Development of Drosophila melanogaster*, Vol I (ed. M. Bate and A. Martinez Arias), pp. 1-70. New York: Cold Spring Harbor Laboratory Press.
- Sunkel, C. E. and Glover, D. M.** (1988). polo, a mitotic mutant of *Drosophila* displaying abnormal spindle poles. *J. Cell Sci.* **89**, 25-38.
- Suter, B. and Steward, R.** (1991). Requirement for phosphorylation and localization of the Bicaudal-D protein in *Drosophila* oocyte differentiation. *Cell* **67**, 917-926.
- Suter, B., Romberg, L. M. and Steward, R.** (1989). Bicaudal-D, a *Drosophila* gene involved in developmental asymmetry: localized transcript accumulation in ovaries and sequence similarity to myosin heavy chain tail domains. *Genes Dev.* **3**, 1957-1968.
- Theurkauf, W. E., Alberts, B. M., Jan, Y. N. and Jongens, T. A.** (1993). A central role for microtubules in the differentiation of *Drosophila* oocytes. *Development* **118**, 1169-1180.
- van Eeden, F. J., Palacios, I. M., Petronczki, M., Weston, M. J. and St Johnston, D.** (2001). Barentsz is essential for the posterior localization of oskar mRNA and colocalizes with it to the posterior pole. *J. Cell Biol.* **154**, 511-523.
- Xu, T. and Rubin, G. M.** (1993). Analysis of genetic mosaics in developing and adult *Drosophila* tissues. *Development* **117**, 1223-1237.
- Yue, L. and Spradling, A. C.** (1992). hu-li tai shao, a gene required for ring canal formation during *Drosophila* oogenesis, encodes a homolog of adducin. *Genes Dev.* **6**, 2443-2454.
